# Supplementary figures and images for: Intra-Regional Glu-GABA vs Inter-Regional Glu-Glu Imbalance: A 1H-MRS Study of the Neurochemistry of Auditory Verbal Hallucinations in Schizophrenia
Source: PubMed Central journal article supplement — Schizophr Bull. 2019 Oct 18;46(3):633–42. doi: 10.1093/schbul/sbz099 (PMC7147588; doi:10.1093/schbul/sbz099), 2019-10-18

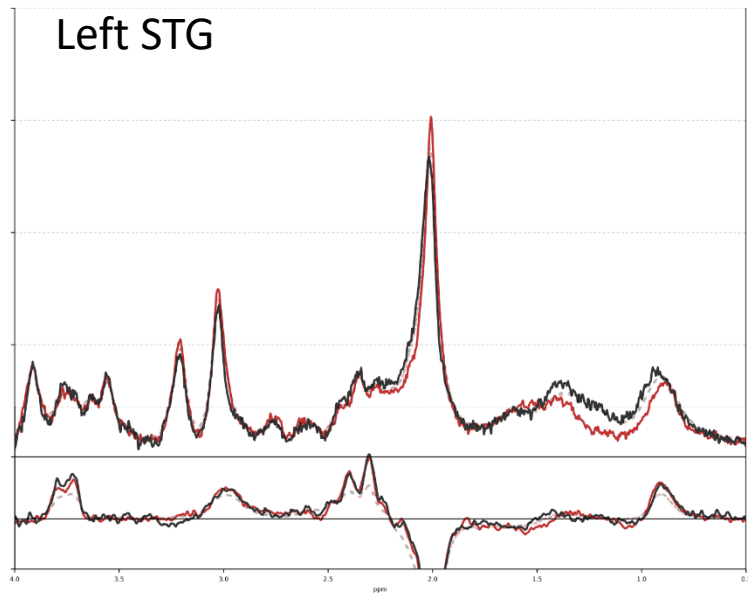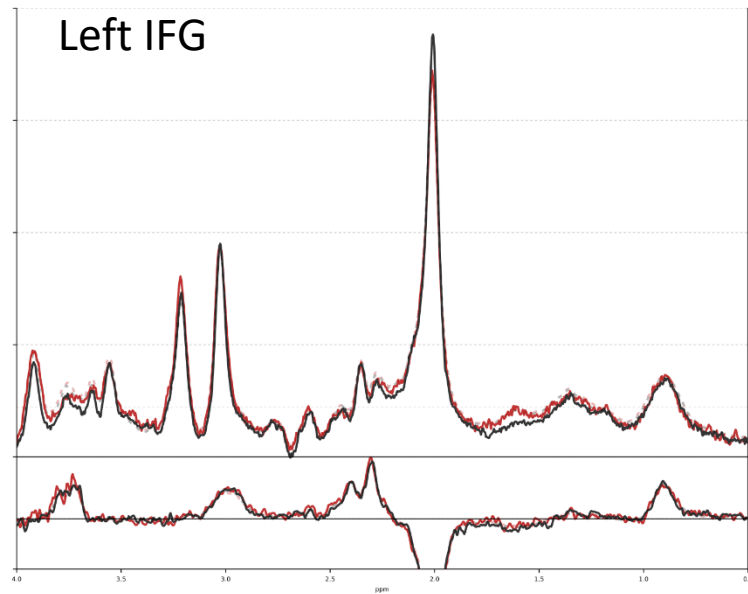

— Patient  
— Control  
- - - Group-average

PRESS

MEGA-PRESS

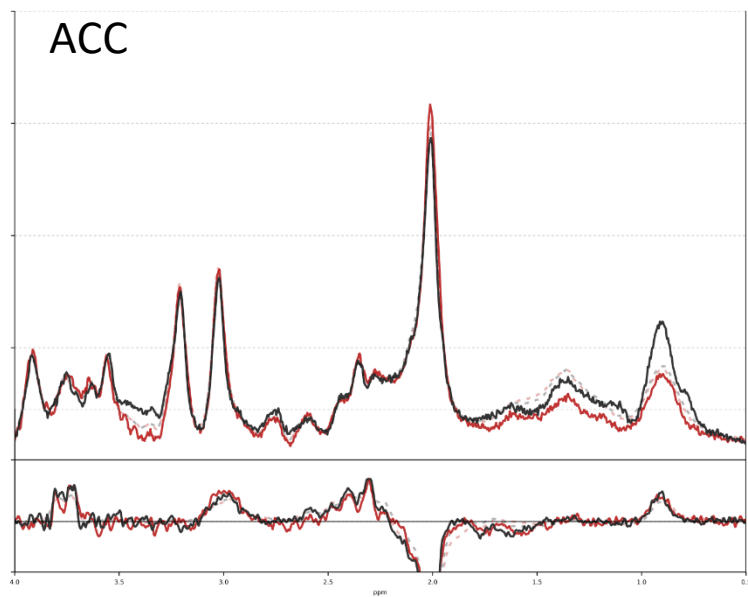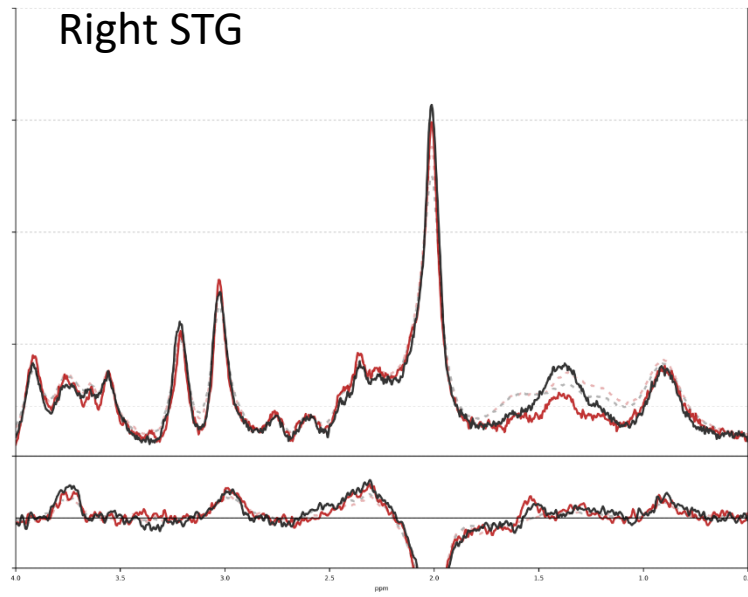

PRESS

MEGA-PRESS

Supplement: sbz099_suppl_supplementary_figure_s1.pdf [file sbz099_suppl_supplementary_figure_s1.pdf]
